# Supplementary material
Source: PubMed Central journal article supplement (PMC7527071)

### Supplementary Table 1

Sequences of primers used for gene disruptions and qRT-PCR analysis. All sequences are shown 5' > 3'.

| Primer    | Sequence                                                      |
|-----------|---------------------------------------------------------------|
| STyYrbEP1 | TTTACTCGAAACAGGGAGTTAAGCCACTCATGCTGTTAAAGTGTAGGCTGGAGCTGCTTC  |
| STyYrbEP2 | CGTTTGCATGAACTCAATTCCCAAACATCAGTGCGGTCAGCATATGAATATCC TCCTTAG |
| STyYrbEUp | CAGGGAGTTAAGCCACTCATG                                         |
| STyYrbEDn | GAACTCAATTCCCAAACATCAG                                        |
| STyYrbER1 | GTAGGGAATTCGGAGTTAAGCCACTCATGCTG                              |
| STyYrbEN1 | ATAGCGGCCGCATGAACTCAATTCCCAAACATC                             |
| STyFliCP1 | CATCAAGTTGTAATTGATAAGGAAAAGATCATGGCACAAGGTGTAGGCTGGAGCTGCTTC  |
| STyFliCP2 | TGTGTACCACGTGTCGGTGAATCAATCGCCGGATTAACGCCATATGAATATCC TCCTTAG |
| STyFliCUp | ATTCAGGTGCCGATACAAGGG                                         |
| STyFliCDn | GCTTTCGCTGCCTTGATTGT                                          |
| STyMtBP1  | TCATCCATTGTCGTCGTA AACGCCGCAGGCACGTGTAGGCTGGAGCTGCTTC         |
| STyMtBP2  | GGTCCGCTTTTGGCGATGTGGGTACGCTTGCCGGCGCATATGAATATCCTCCTTAG      |
| STyMtBUp  | CAGTGAGCGTCCATCGTTTA                                          |
| STyMtBDn  | GCAGATGCTGCTCCATATCA                                          |
| STmFijBF  | ATTAAAGCGGCTACGGGTGG                                          |
| STmFijBR  | AGGCATTGTGGTTTTAGTTGCG                                        |
| STyYrbBF  | AGATCTCCAGGGTAGATACGG                                         |
| STyYrbBR  | AAGTACGTCTTCGGGCAAG                                           |
| STyYrbCF  | GTGAAGCCTATTTTGCAGCG                                          |
| STyYrbCR  | TTACACGGATAGGCACAATGG                                         |

# Supplementary Figure 1

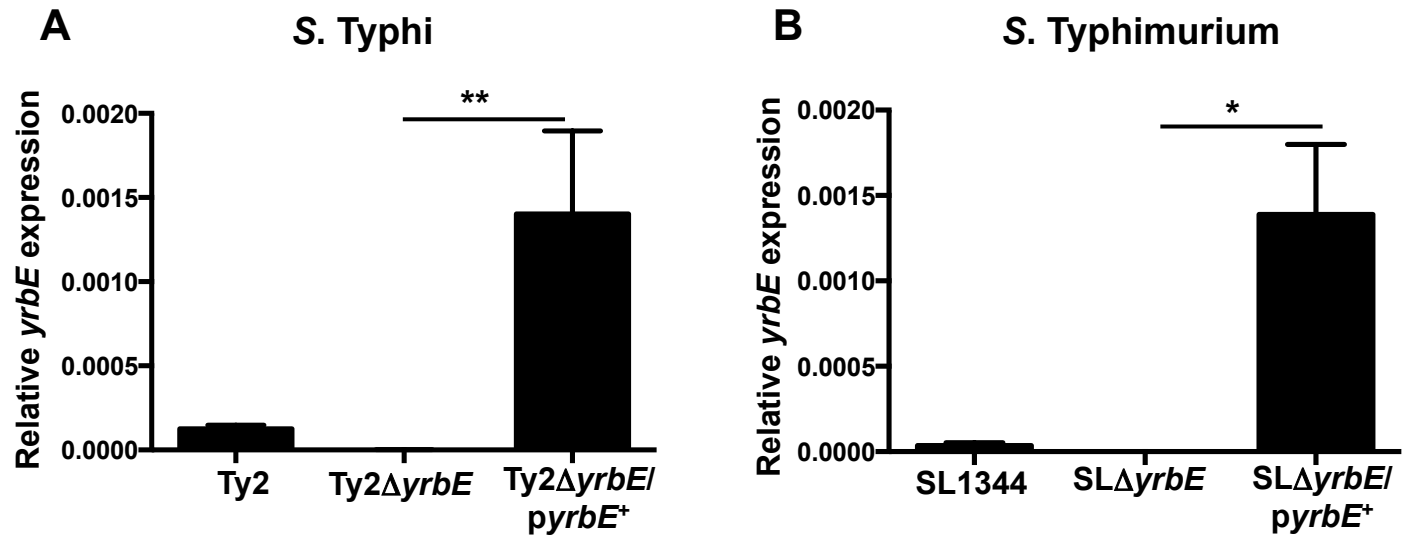

## Supplementary Figure 2

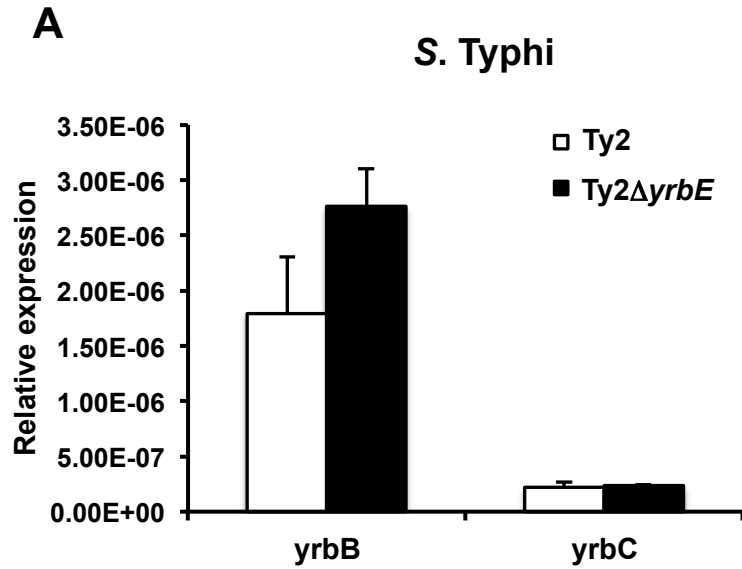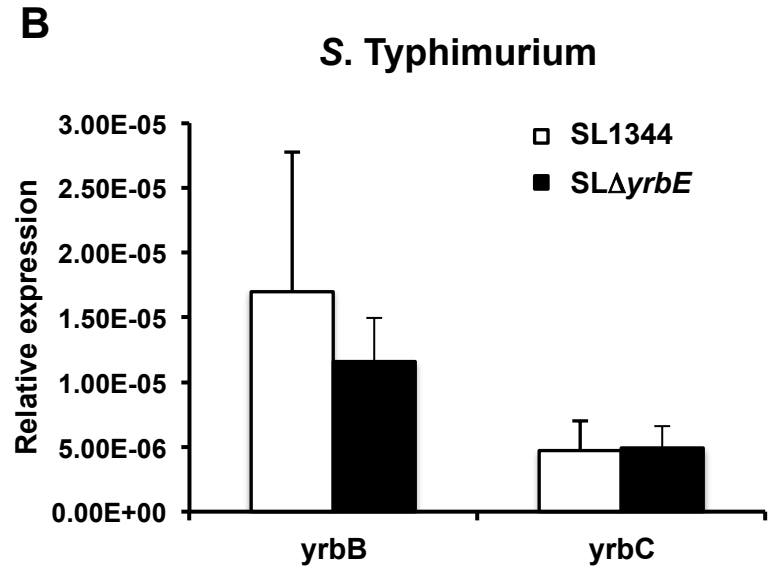

# Supplementary Figure 3

**A**

**S. Typhi**

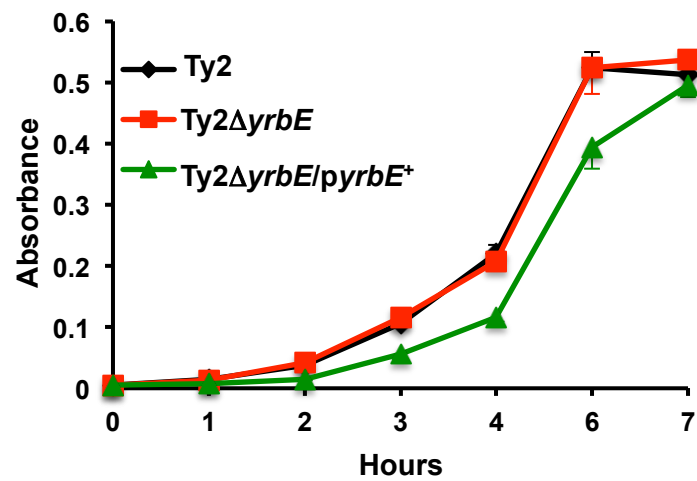

**B**

**S. Typhimurium**

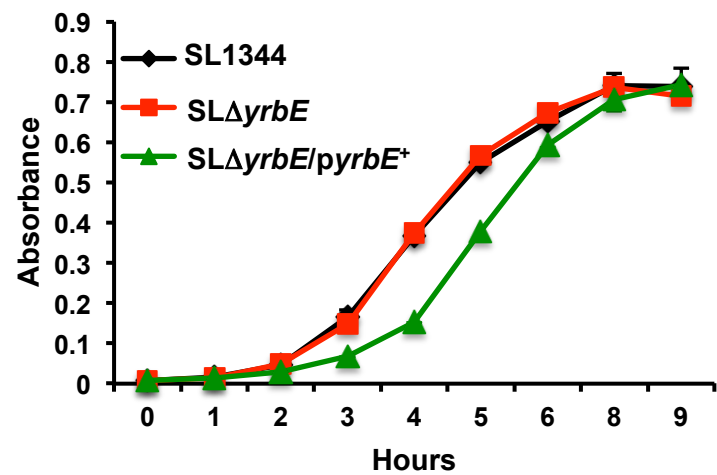

## Supplementary Figure 4

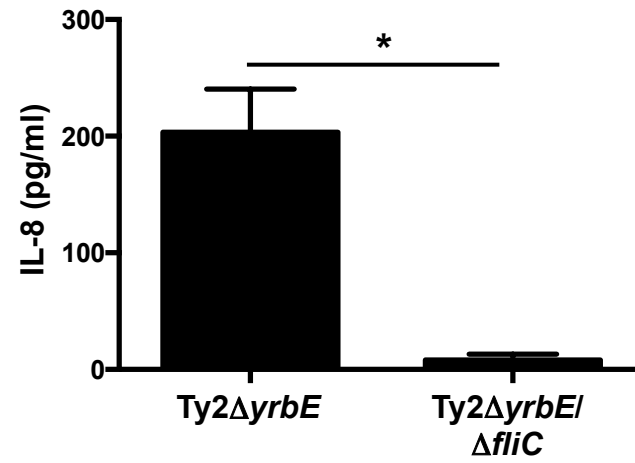

# Supplementary Figure 5

**A**

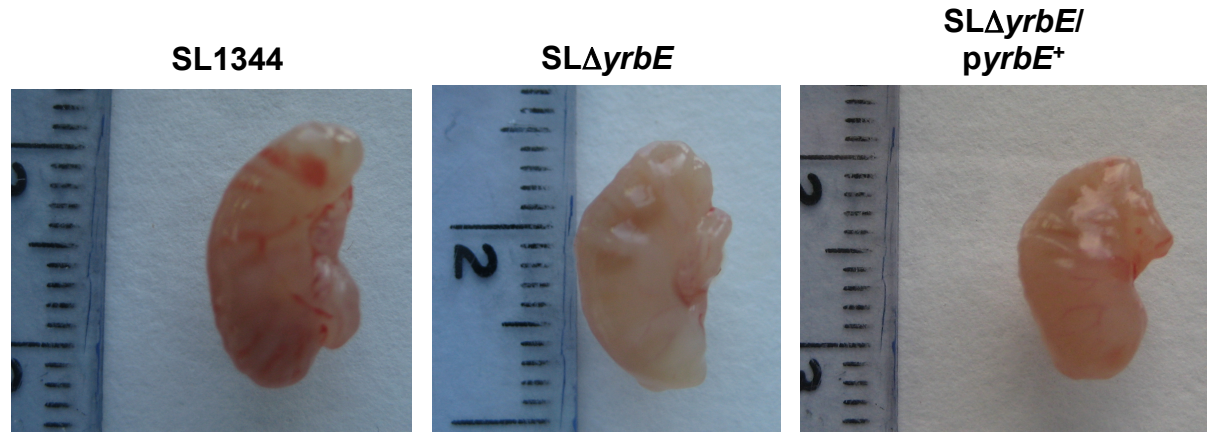

**B**

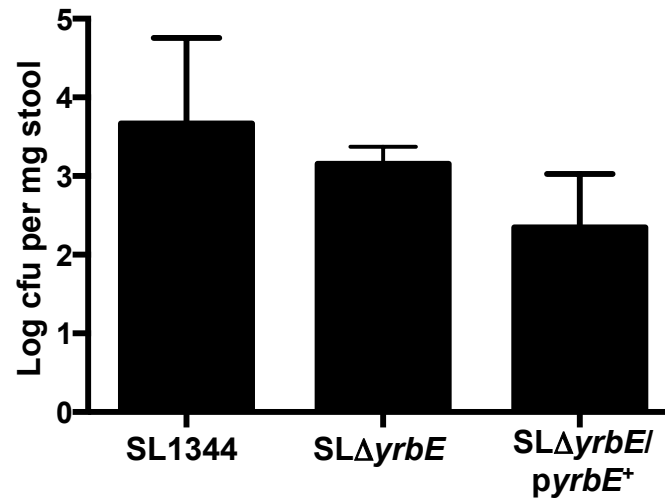

Supplement: KGMI_A_1697593_SM3688.pdf [file KGMI_A_1697593_SM3688.pdf]
